# Supplementary material
Source: PubMed Central journal article supplement (PMC3509171)

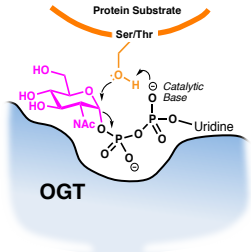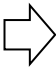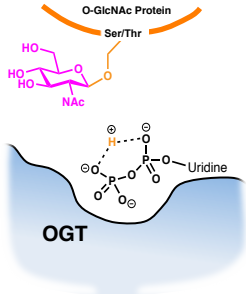

Supplement: NIHMS50081-supplement-2.pdf [file NIHMS50081-supplement-2.pdf]
